# Supplementary material for: Evaluation of whole exome sequencing as an alternative to BeadChip and whole genome sequencing in human population genetic analysis
Source: PubMed Central journal article supplement (PMC6206721; doi:10.1186/s12864-018-5168-x), 2018-10-29
Supplement: 12864_2018_5168_MOESM1_ESM.pdf [file 12864_2018_5168_MOESM1_ESM.pdf]

# Supplementary information

## Contents

|                 |    |
|-----------------|----|
| Table S1 .....  | 2  |
| Table S2 .....  | 3  |
| Figure S1 ..... | 4  |
| Figure S2 ..... | 5  |
| Figure S3 ..... | 6  |
| Figure S4 ..... | 7  |
| Figure S5 ..... | 8  |
| Figure S6 ..... | 9  |
| Figure S7 ..... | 10 |
| Data.....       | 11 |

**Table S1**

Number of high-quality biallelic variants in different datasets before and after LD pruning.

| dataset   | biallelic variants |                |        |                                    |             |
|-----------|--------------------|----------------|--------|------------------------------------|-------------|
|           | unpruned           | pruned         |        |                                    |             |
|           |                    | sliding window |        | difference between pruning windows |             |
|           |                    | 50k            | 1000k  | count                              | percent (%) |
| GENOME    | 483100             | 232194         | 206253 | 25941                              | 11.17%      |
| EXOME     | 405496             | 184258         | 149453 | 34805                              | 18.89%      |
| BEADCHIP  | 567187             | 79492          | 72701  | 6791                               | 8.54%       |
| HUN-EXOME | 408790             | 186984         | 151259 | 35725                              | 19.11%      |

The unpruned datasets were LD pruned by Plink with two different sliding windows (50k and 10,000k respectively), and the difference of pruned markers between the two parameter settings is also summarized.

## Table S2

$f_3$ -statistics of Hungarian and selected South Asian populations.

| Pop A | Pop B | Pop C | F3 value  | Std Err  | Z score | SNP count |
|-------|-------|-------|-----------|----------|---------|-----------|
| STU   | HUN   | PJL   | -0.003761 | 0.000140 | -26.782 | 76834     |
| ITU   | HUN   | PJL   | -0.003641 | 0.000141 | -25.752 | 76845     |
| BEB   | HUN   | PJL   | -0.002865 | 0.000138 | -20.743 | 80622     |

Negative  $F_3$  values with significant Z score indicate complex relations (admixture) between the Hungarian and South Asian populations.

## Figure S1

$F_4(\text{TSI}, X; \text{CHB}; \text{YRI})$  values of the analyzed datasets

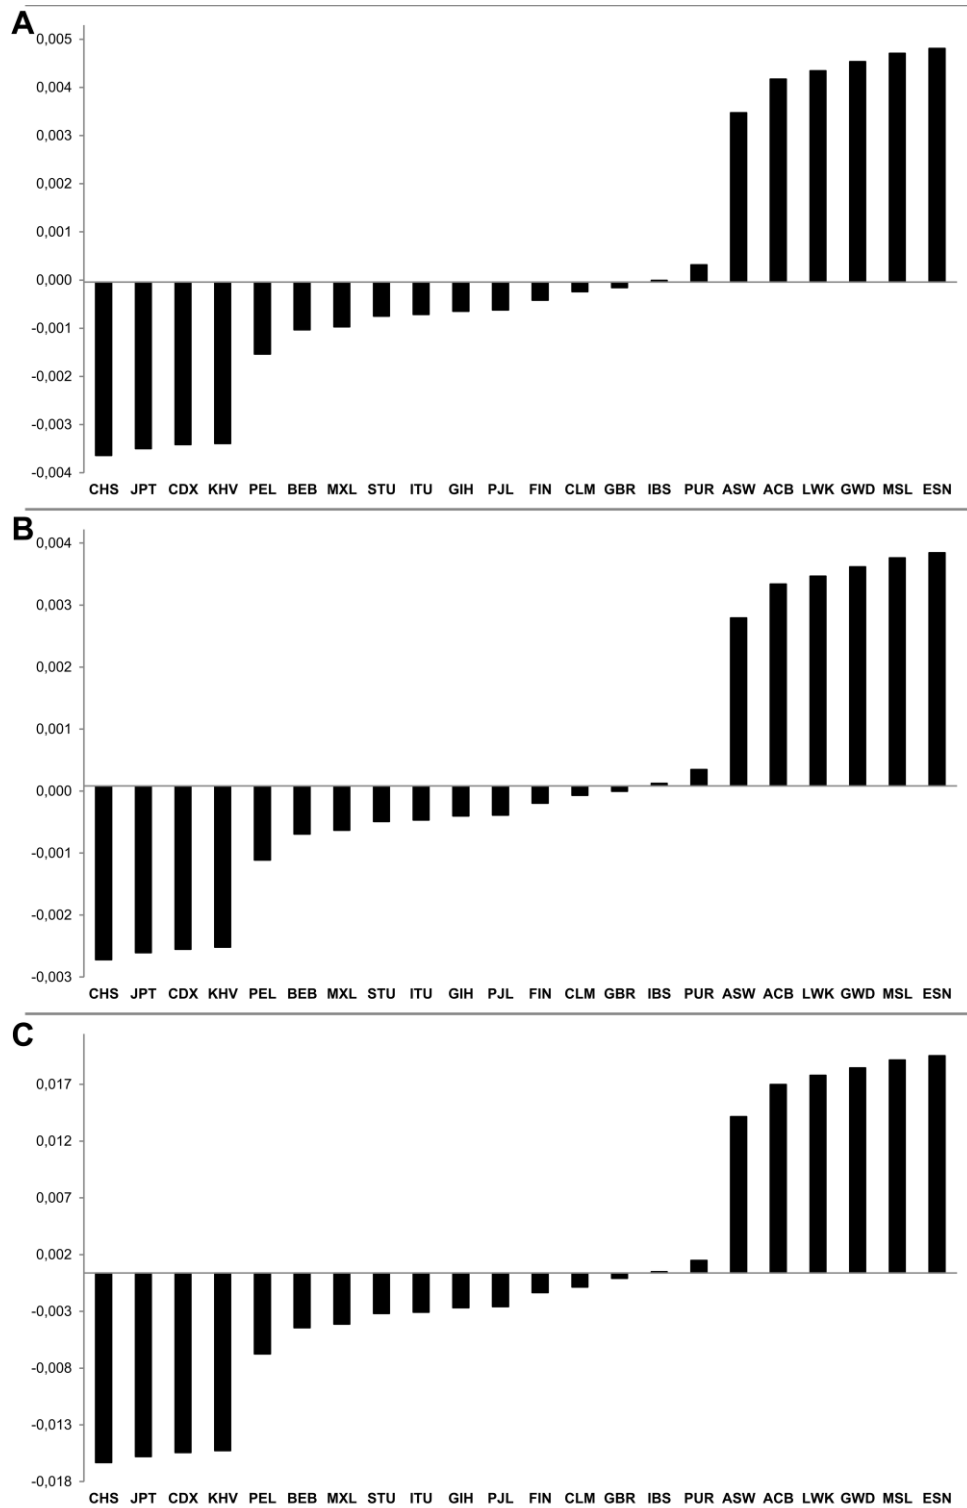

A) GENOME, B) EXOME and C) BEADCHIP, where X denotes the test population indicated on the x-axis.

**Figure S2**

Calculated Cross Validation error for different admixture models (K=3 to 10) for each dataset.

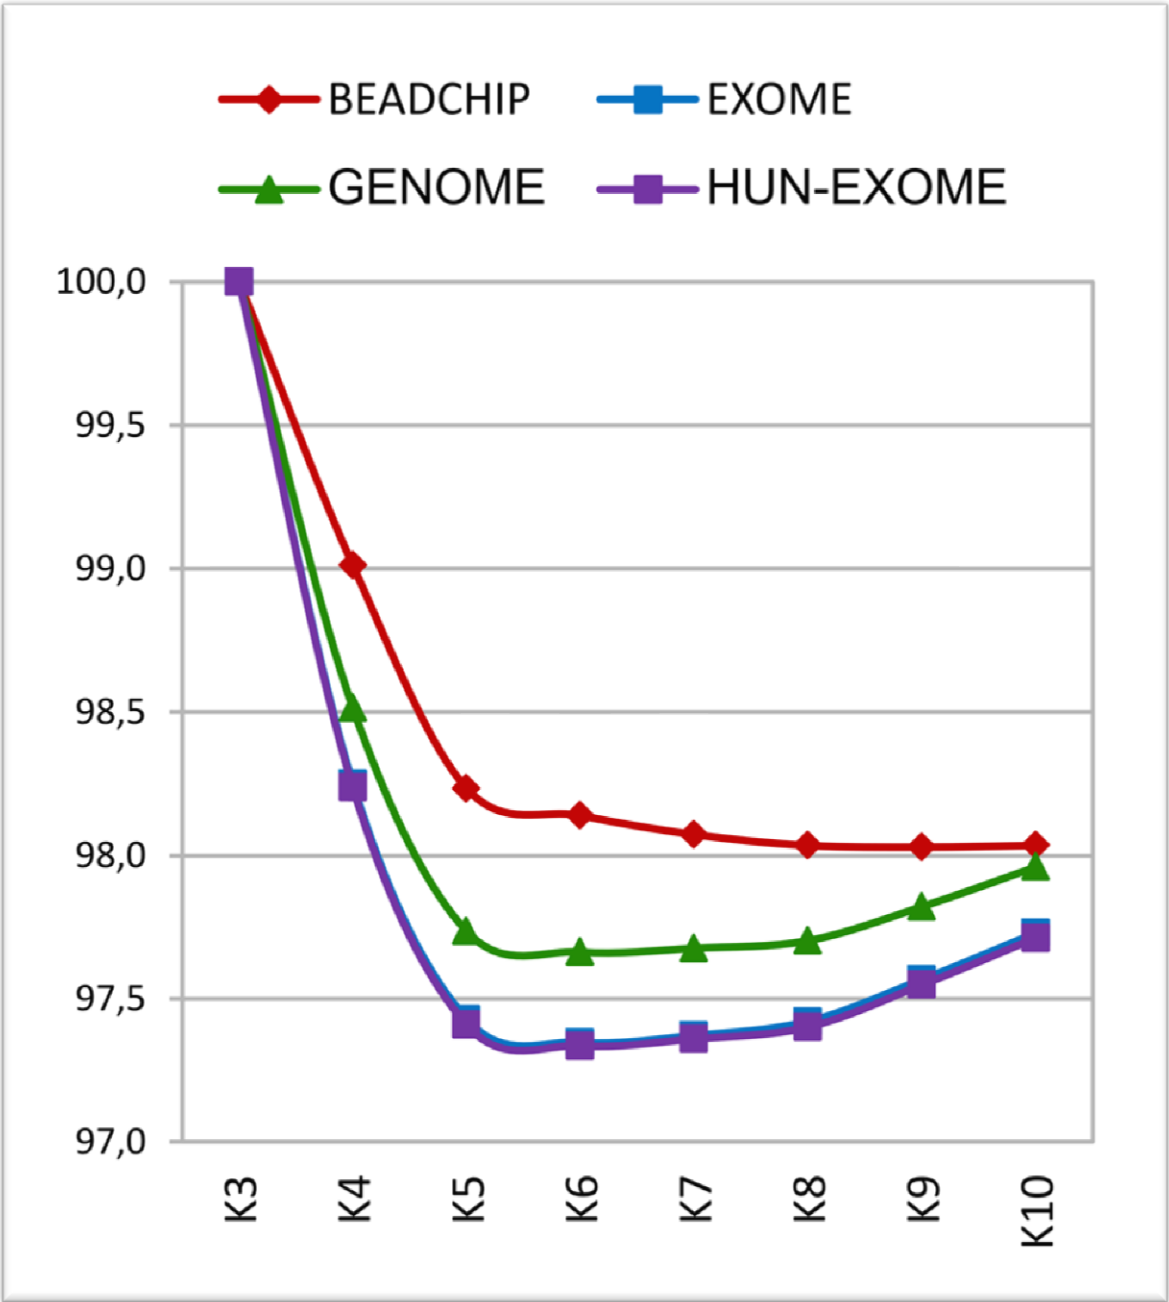

### Figure S3

Admixture analysis of 25 populations using the GENOME, EXOME and BEADCHIP datasets with the K=6 admixture model.

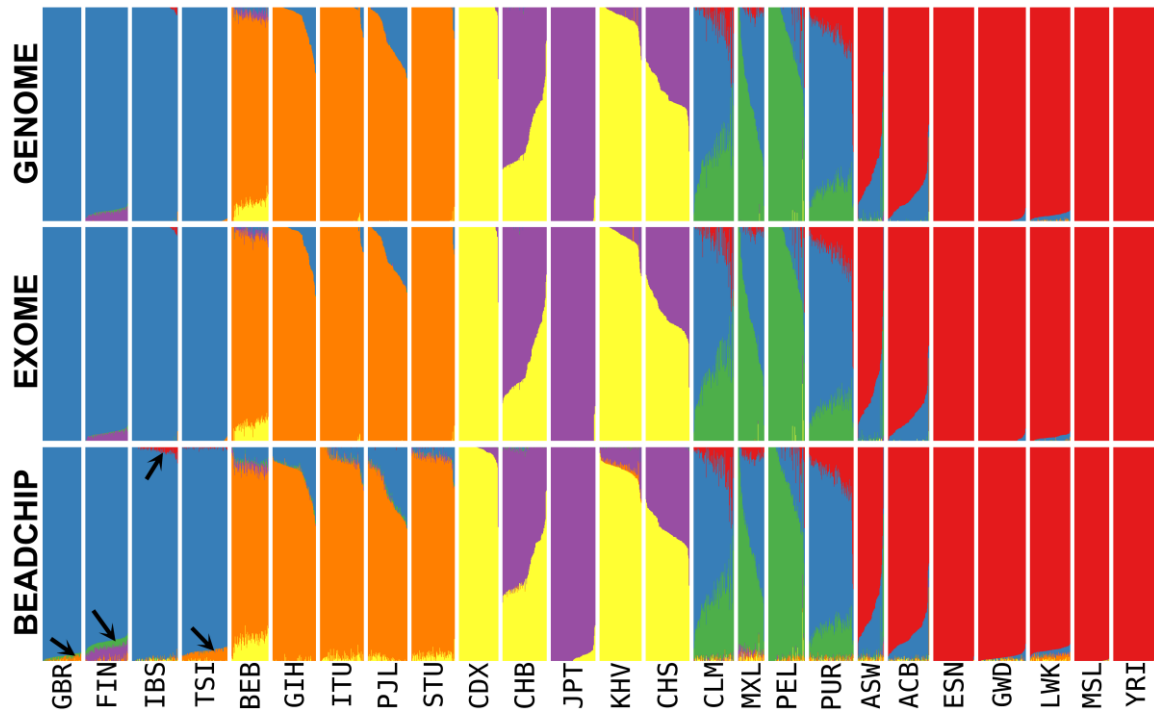

The arrows denote examples of minor genetic admixture components within the European super-population.

## Figure S4

Admixture analysis of 25 populations using the GENOME, EXOME and BEADCHIP datasets with the K=9 admixture model.

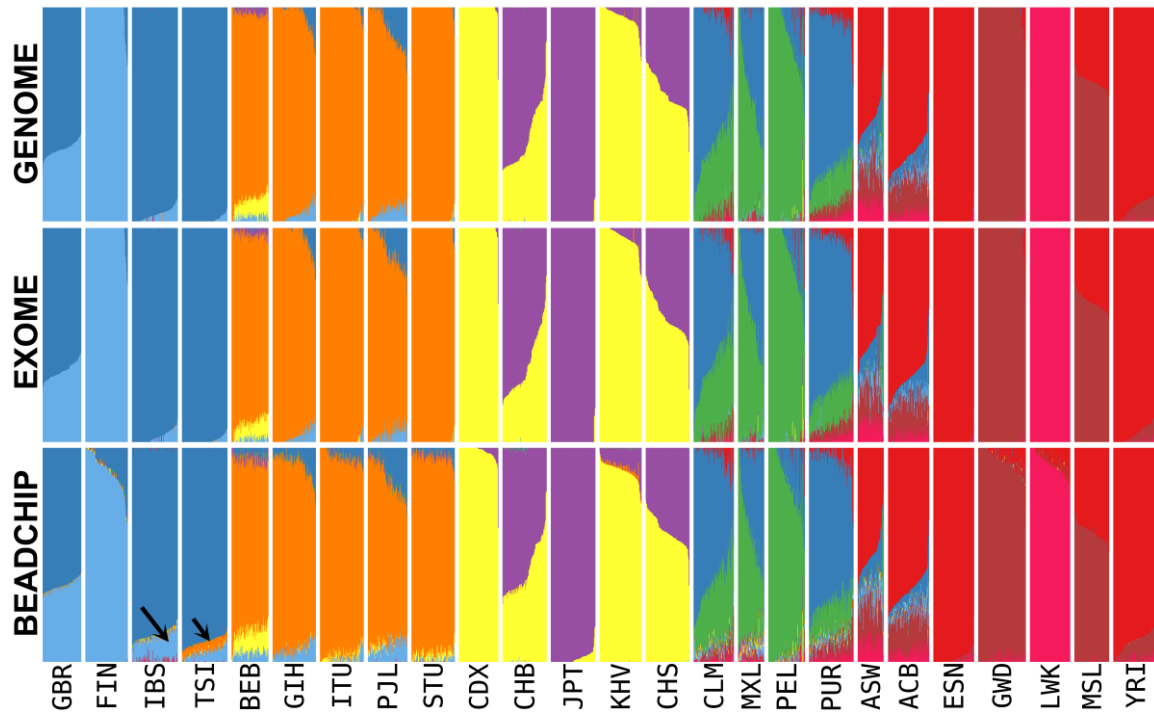

The arrows denote examples of minor genetic admix components within the European super-population.

# Figure S5

PCA of the HUN-EXOME dataset

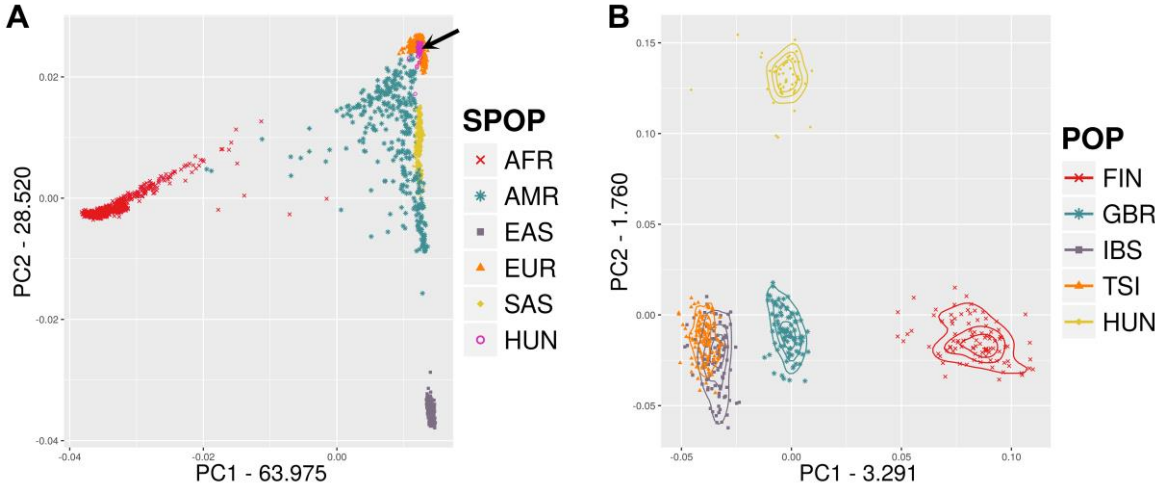

**A)** Hungarians (highlighted by the arrow) in relation to the super-population, **B)** Hungarians in relation to European populations.



## Figure S6

$F_4(\text{TSI}, X; \text{CHB}, \text{YRI})$  values of the HUN-EXOME dataset, where X denotes the test population indicated on the x-axis.

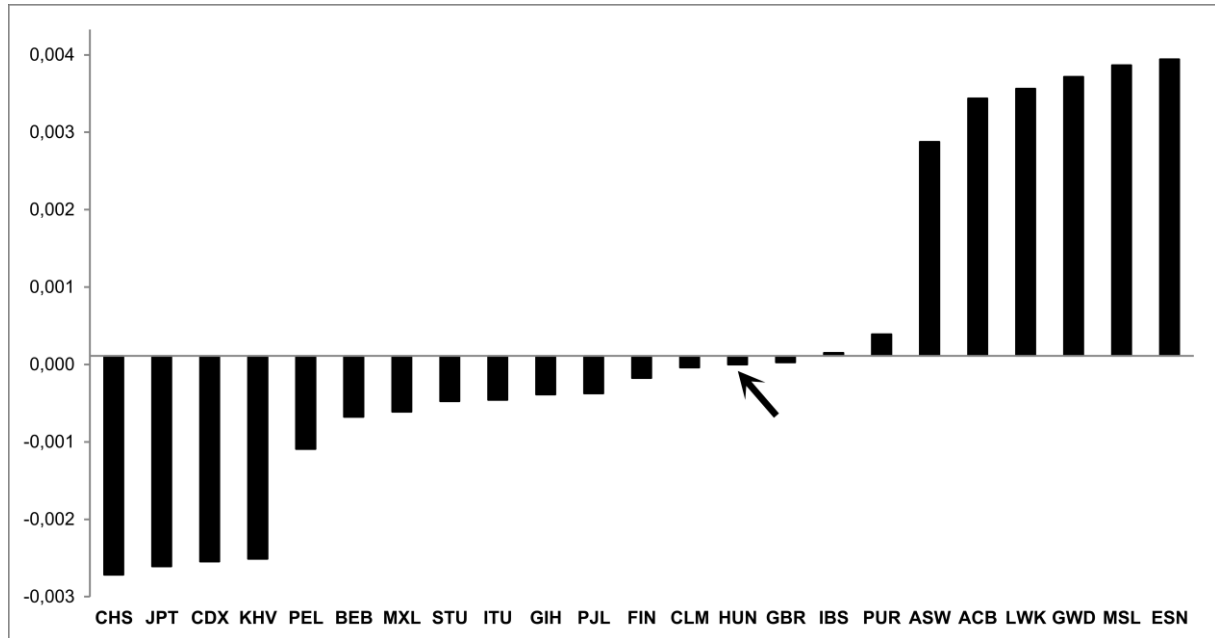

The arrow shows the relative position of Hungarians, indicating that they have higher East Asian admixture component than British but lower than Finnish population.

# Figure S7

Admixture analysis of 25 populations using the HUN-EXOME dataset for the **A) K=6** and **B) K=9** admixture models.

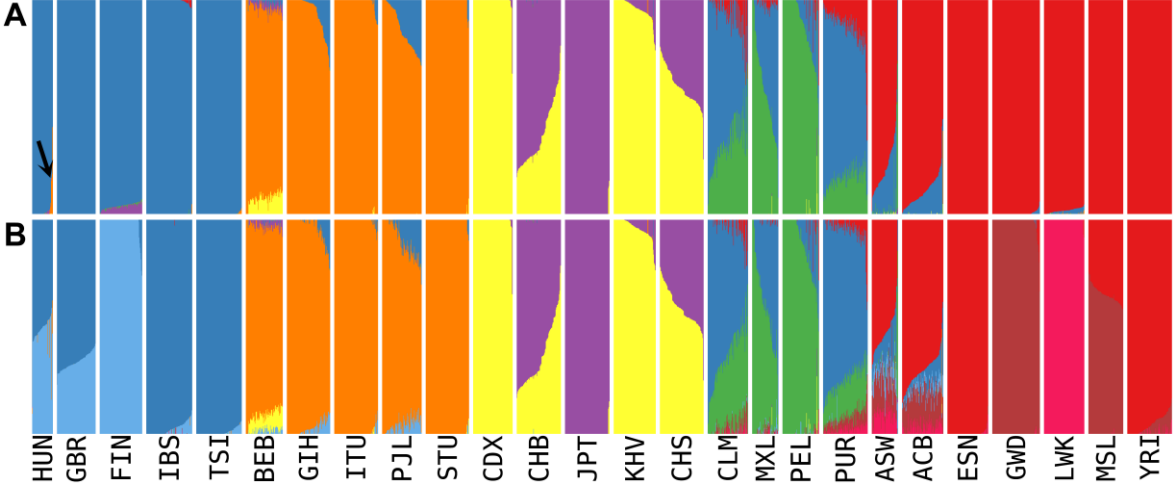

The arrow denotes Hungarian individuals with substantial South Asian admixture components.

## Data

We have deposited the Supplementary Data to figshare:

<https://figshare.com/s/e91794c7141a7eb16255>
